# Supplementary material
Source: publisher site journal article supplement (https://www.dovepress.com/get_supplementary_file.php?f=325787.docx)
Supplement: Supplementary file 1 [file get_supplementary_file.php]

Supplementary material: **Estimating the long-term epidemiological trends and seasonality of** **hemorrhagic fever with renal syndrome in China**

Yuhan Xiao1,*, Yanyan Li1,*, Yuhong Li2, Chongchong Yu1, Yichun Bai1, Lei Wang3, Yongbin Wang1

1 Department of Epidemiology and Health Statistics, School of Public Health, Xinxiang Medical University, Xinxiang, Henan Province, P.R. China; 2 National Center for Tuberculosis Control and Prevention, China Center for Disease Control and Prevention, Beijing, P.R. China; 3 Center for Musculoskeletal Surgery, Charité–Universitätsmedizin Berlin, Corporate Member of Freie Universität Berlin, Humboldt–Universität Zu Berlin and Berlin Institute of Health, Berlin, Germany

Correspondence: Yongbin Wang

Department of Epidemiology and Health Statistics, School of Public Health, Xinxiang Medical University, Xinxiang 453000, Henan Province, P.R. China

Email [wybwho@163.com](mailto:wybwho@163.com) (Yongbin Wang)

*These authors contributed equally to this paper


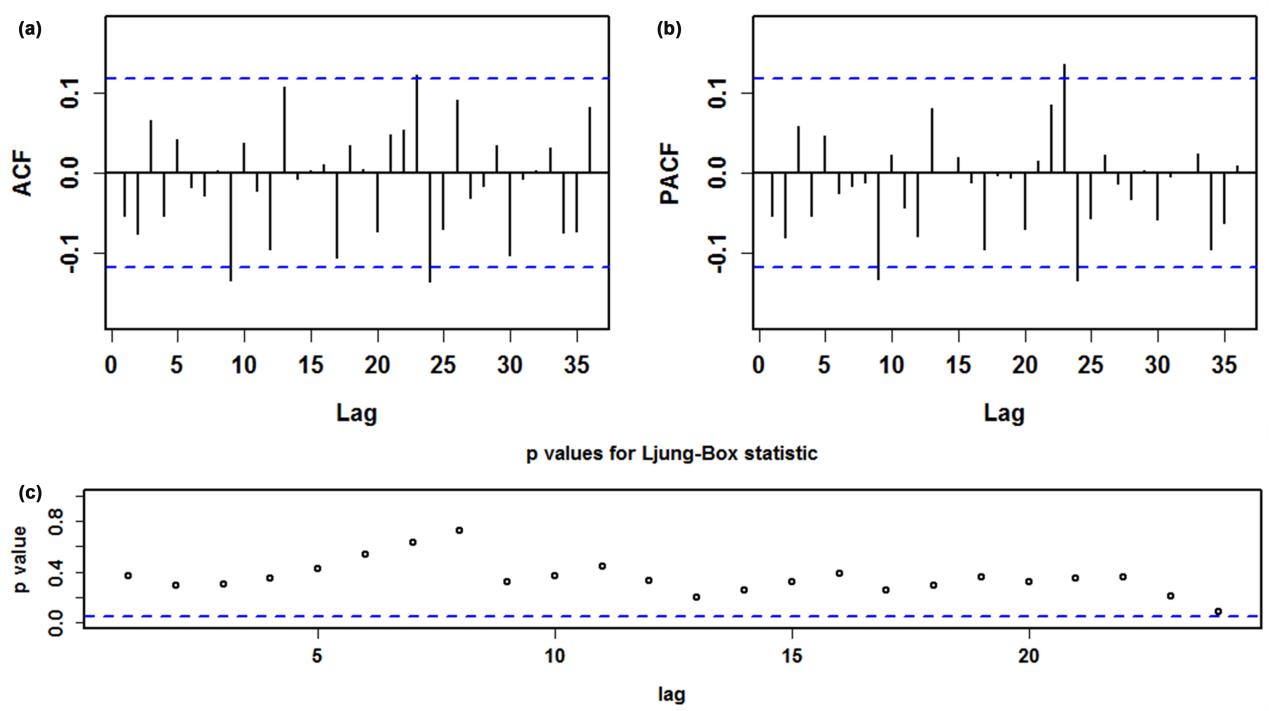


**Figure S1.** Diagnostic test plot for the forecast errors of the SARIMA model created with the data between 1995 and 2018. (a) Autocorrelation function (ACF) plot, (b) partial autocorrelation function (PACF) plot, and (c) *p*-values for Ljung-Box statistic. We could see from the sample correlogram that there were little sample ACFs and PACFs touching the significance bounds, except for that at lags 9, 23, and 24, and the *p*-value was greater than 0.05 under the Ljung-Box test statistic. These results meant that the selected SARIMA approach provides an adequate predictive model for the HFRS incidence.


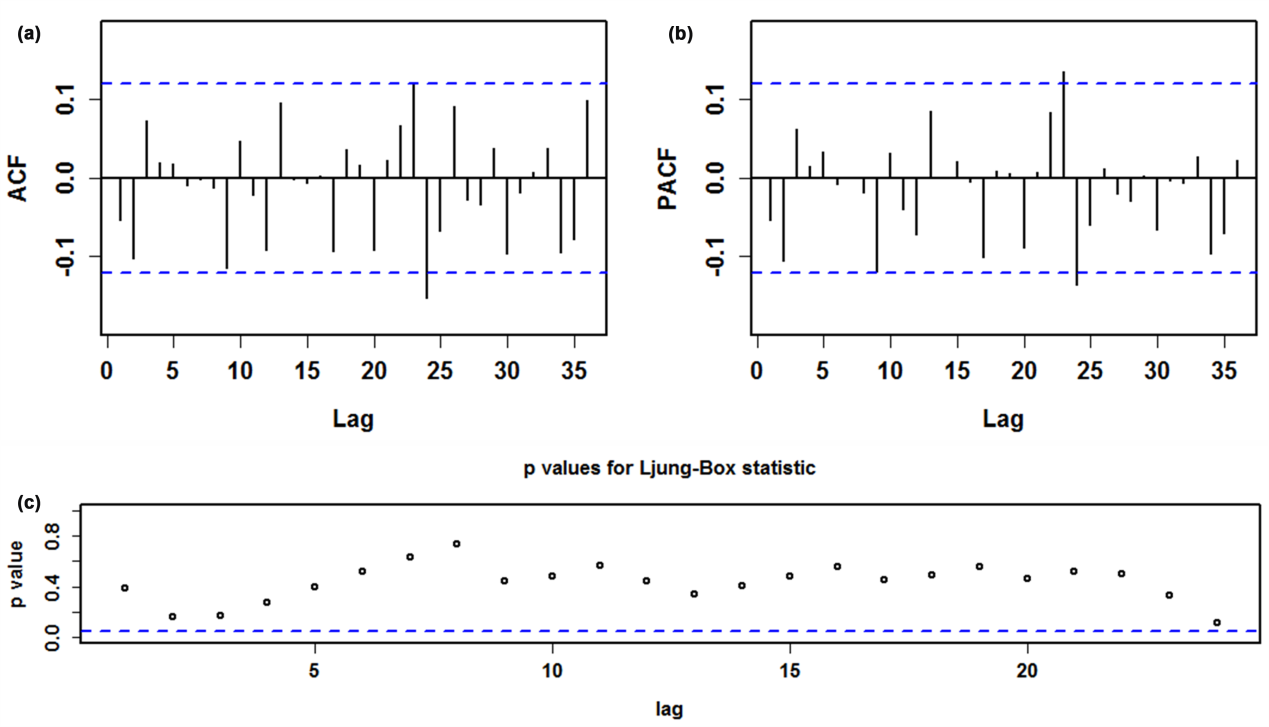


**Figure S2.** Diagnostic test plot for the forecast errors of the SARIMA model created with the data between 1995 and 2017. (a) Autocorrelation function (ACF) plot, (b) partial autocorrelation function (PACF) plot, and (c) *p*-values for Ljung-Box statistic. We could see from the sample correlogram that there were little sample ACFs and PACFs touching the significance bounds, except for that at lags 23 and 24, and the *p*-value was greater than 0.05 under the Ljung-Box test statistic. These results meant that the selected SARIMA approach provides an adequate predictive model for the HFRS incidence.


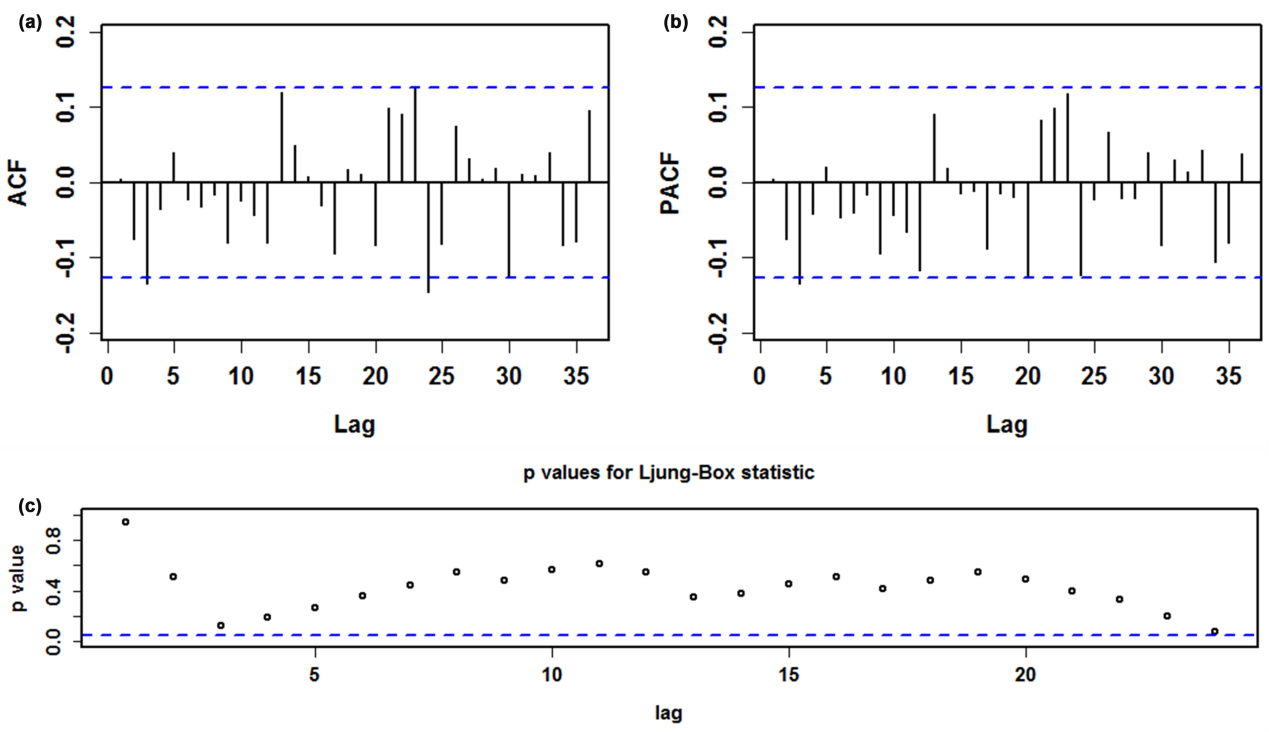


**Figure S3.** Diagnostic test plot for the forecast errors of the SARIMA model created with the data between 1995 and 2015. (a) Autocorrelation function (ACF) plot, (b) partial autocorrelation function (PACF) plot, and (c) *p*-values for Ljung-Box statistic. We could see from the sample correlogram that there were little sample ACFs and PACFs touching the significance bounds, except for that at lags 2 and 24, and the *p*-value was greater than 0.05 under the Ljung-Box test statistic. These results meant that the selected SARIMA approach provides an adequate predictive model for the HFRS incidence.


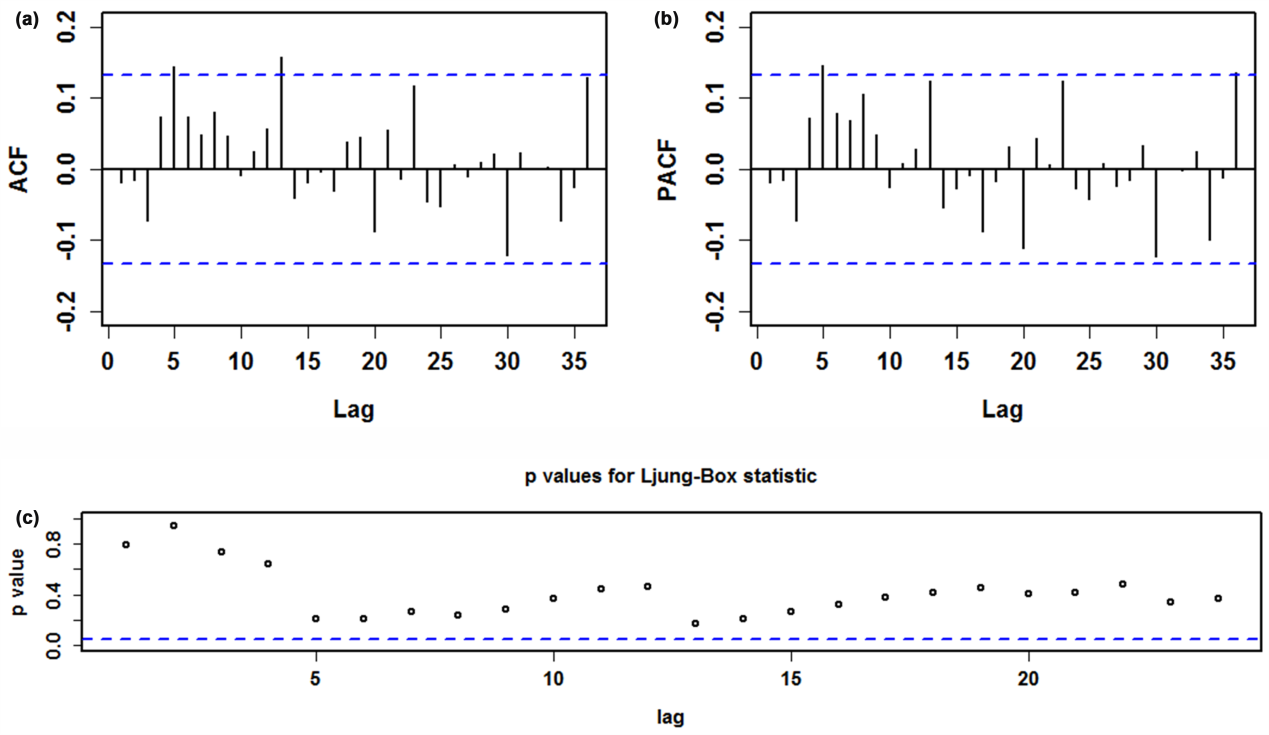


**Figure S4.** Diagnostic test plot for the forecast errors of the SARIMA model created with the data between 1995 and 2013. (a) Autocorrelation function (ACF) plot, (b) partial autocorrelation function (PACF) plot, and (c) *p*-values for Ljung-Box statistic. We could see from the sample correlogram that there were little sample ACFs, except for that at lags 5 and 13, and PACFs, except for that at lag 5, touching the significance bounds and the *p*-value was greater than 0.05 under the Ljung-Box test statistic. These results meant that the selected SARIMA approach provides an adequate predictive model for the HFRS incidence.


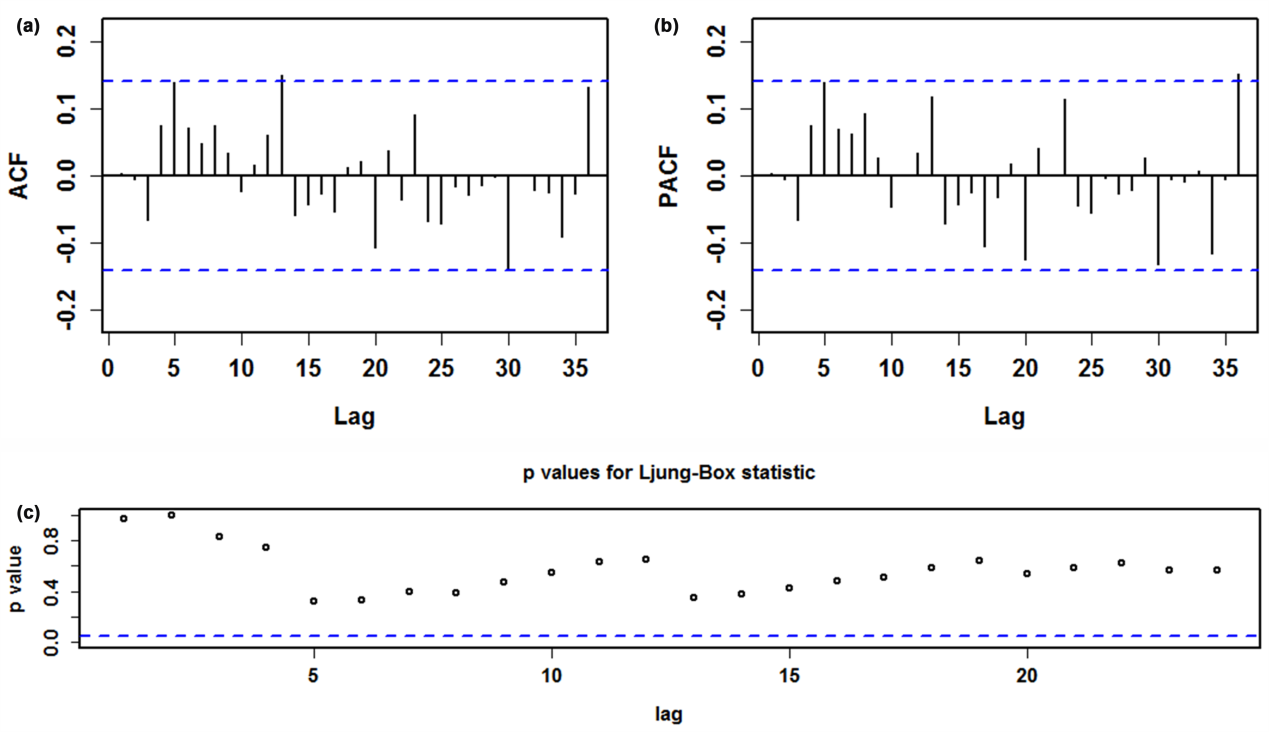


**Figure S5.** Diagnostic test plot for the forecast errors of the SARIMA model created with the data between 1995 and 2013. (a) Autocorrelation function (ACF) plot, (b) partial autocorrelation function (PACF) plot, and (c) *p*-values for Ljung-Box statistic. We could see from the sample correlogram that there were little sample ACFs, except for that at lag 13, and PACFs, except for that at lag 36, touching the significance bounds and the *p*-value was greater than 0.05 under the Ljung-Box test statistic. These results meant that the selected SARIMA approach provides an adequate predictive model for the HFRS incidence.


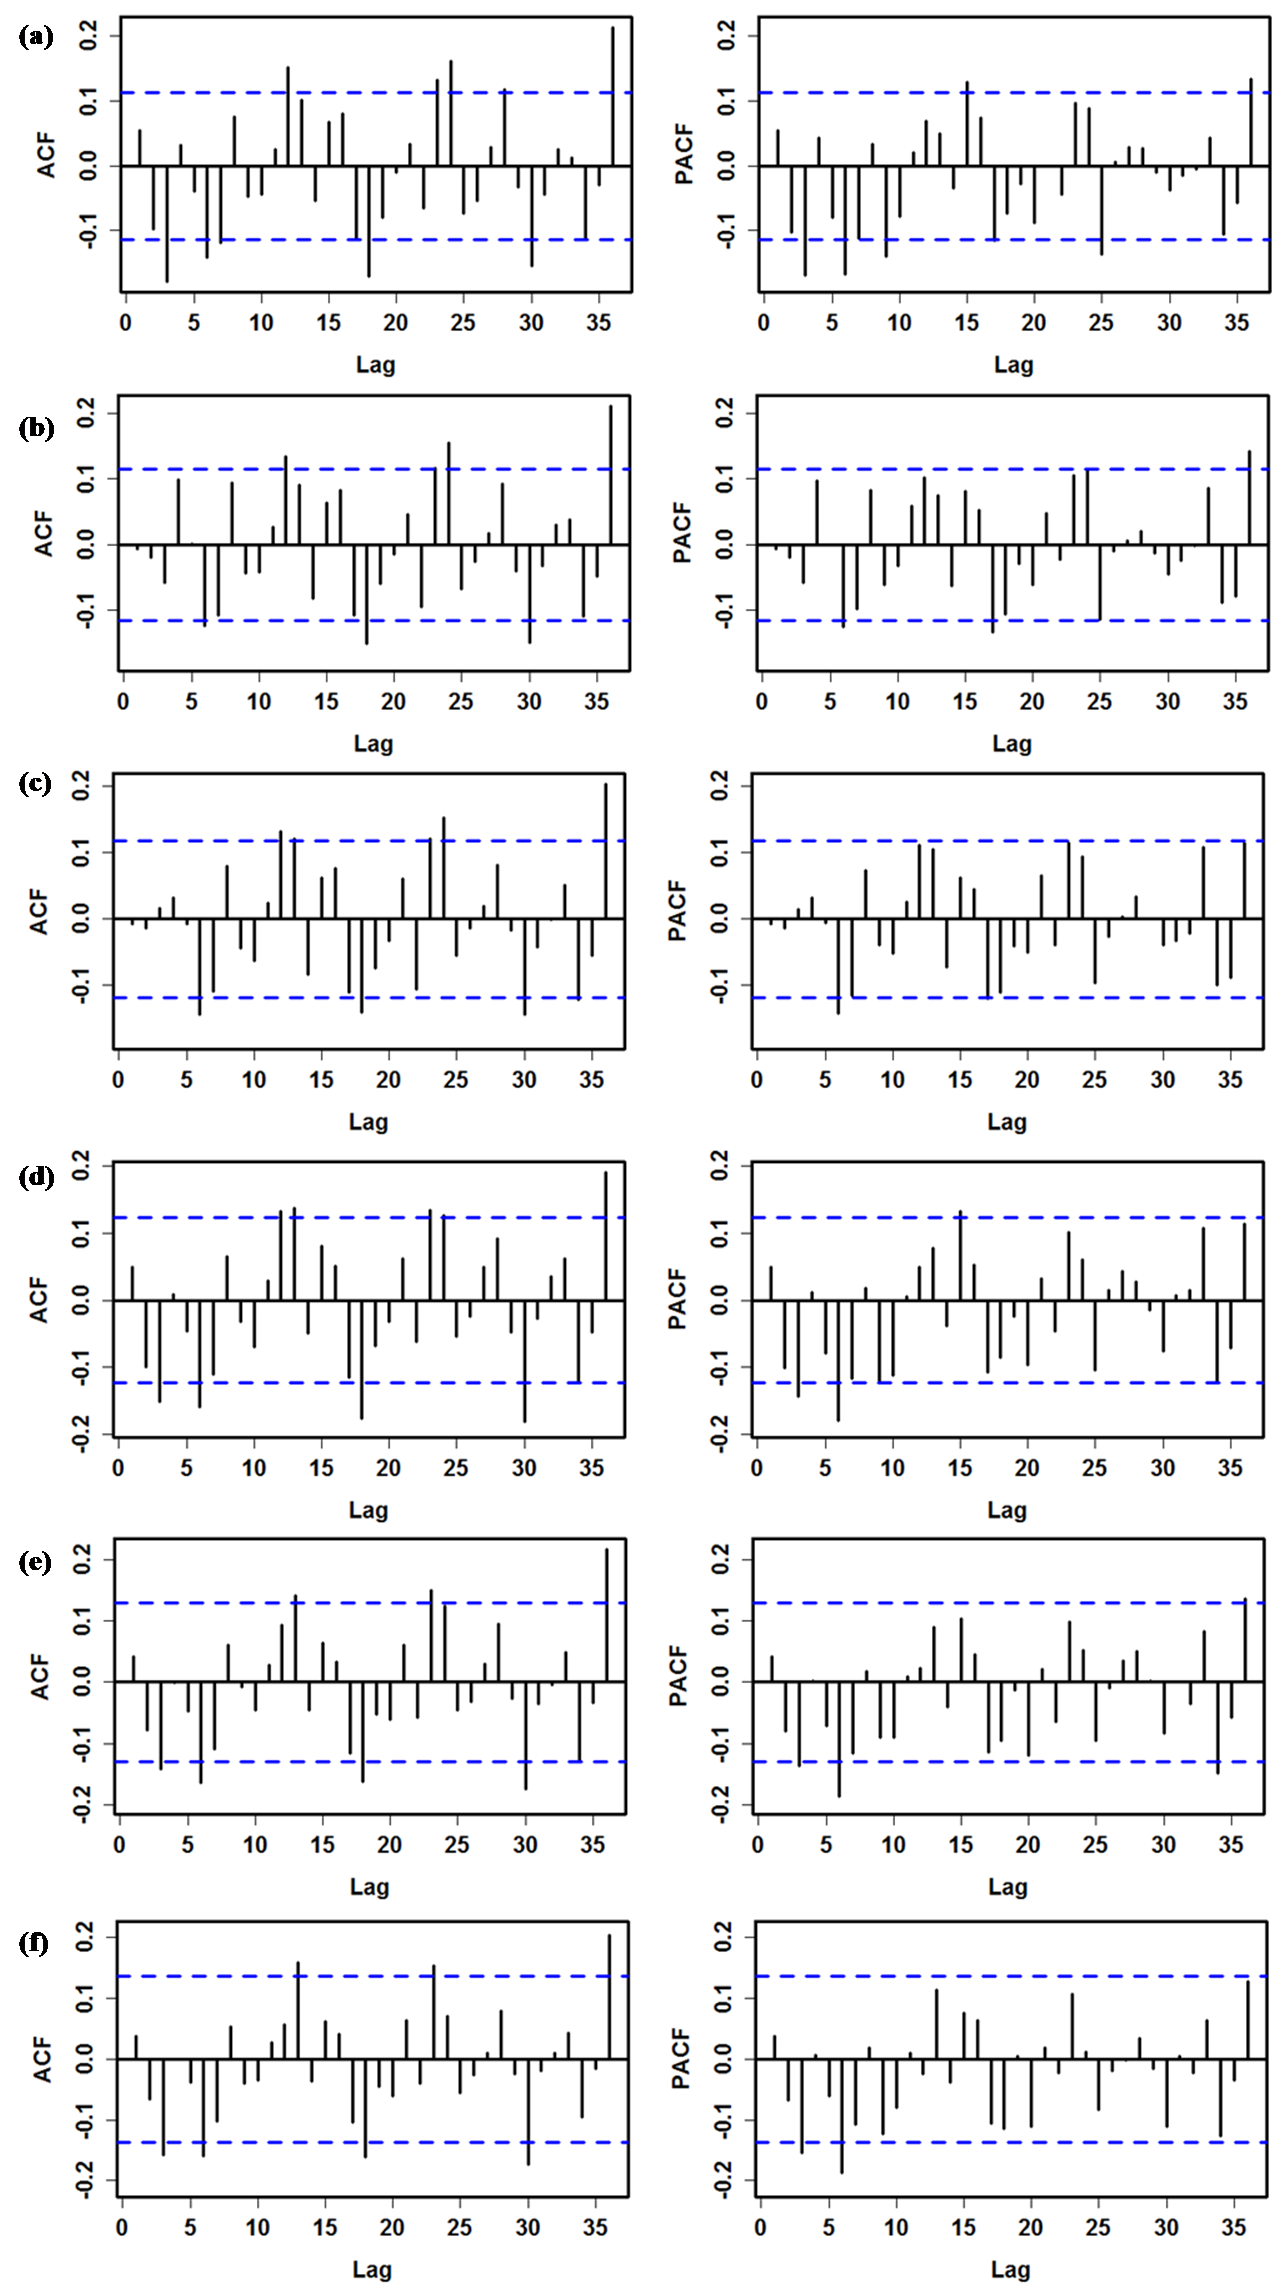


**Figure S6.** Diagnostic test plots for the forecast errors of the TBATS models. (a) Autocorrelation function (ACF) and partial autocorrelation function (PACF) plots for the 12-data ahead forecast. (b) ACF and PACF plots for the 24-data ahead forecast. (c) ACF and PACF plots for the 36-data ahead forecast. (d) ACF and PACF plots for the 60-data ahead forecast. (e) ACF and PACF plots for the 84-data ahead forecast. (f) ACF and PACF plots for the 108-data ahead forecast. We could see from the sample correlogram that there were some sample ACFs and PACFs touching the significance bounds, indicating that although the selected TBATS models provided accurate forecasts for our data, they can be further improved (e.g., we can develop some new hybrid models by combing the TBATS model and neural network techniques to improve the forecasting ability).


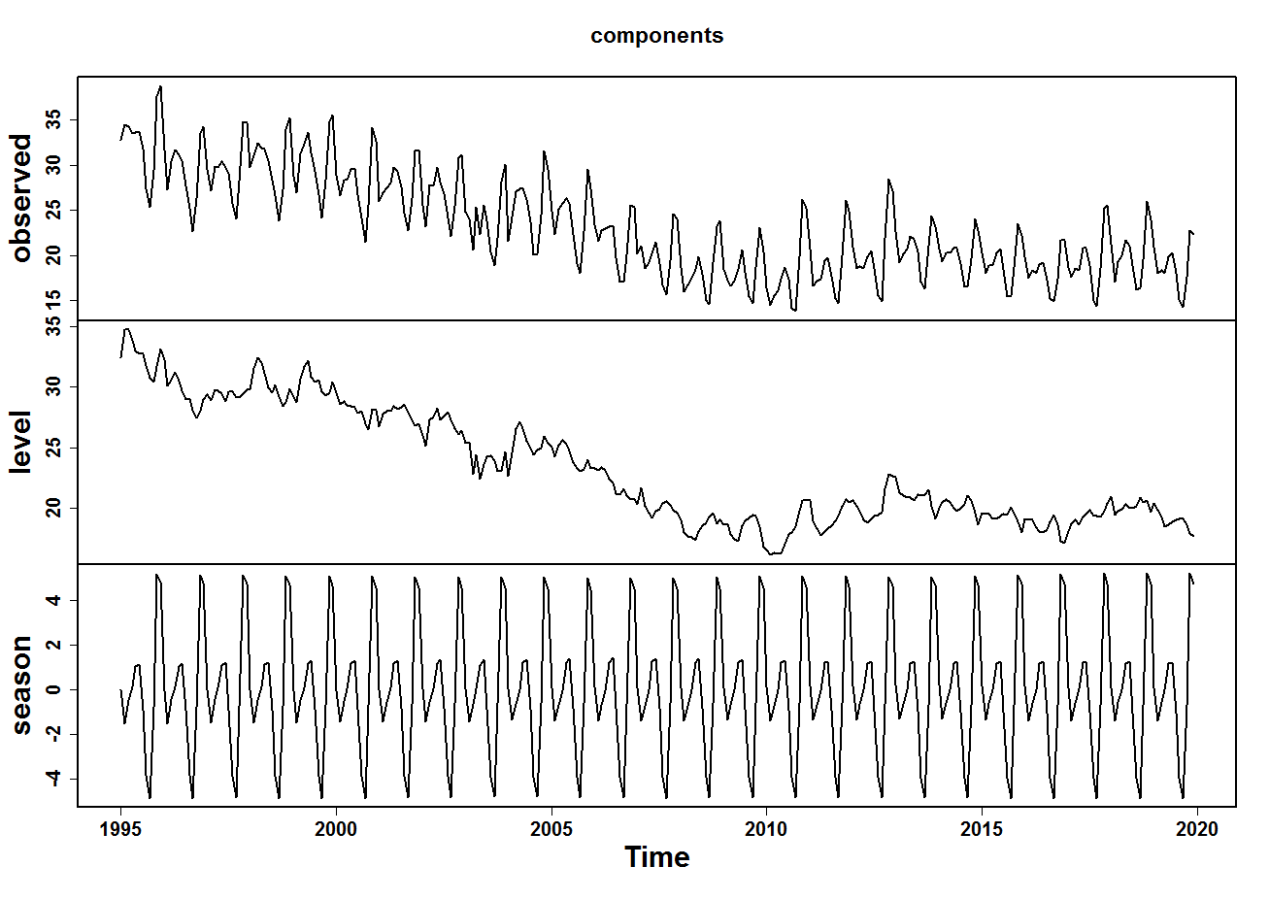


**Figure S7.** The extracted level and seasonal components for the data between January 1995 and December 2019 using the TBATS(0.27, {0,0}, -, {<12,4>}) model.


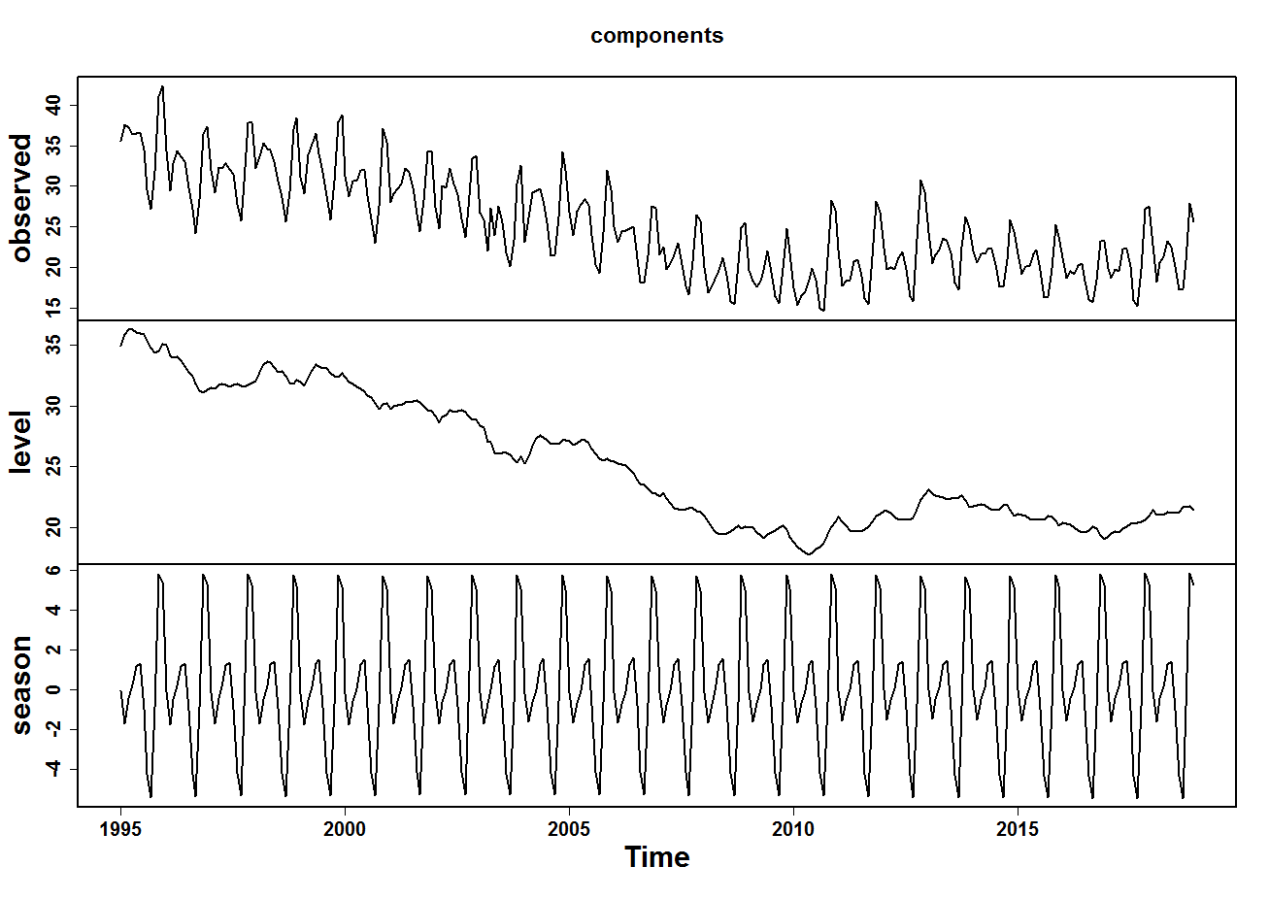


**Figure S8.** The extracted level and seasonal components for the data between January 1995 and December 2018using the TBATS(0.285, {3,0}, -, {<12,4>}) model.


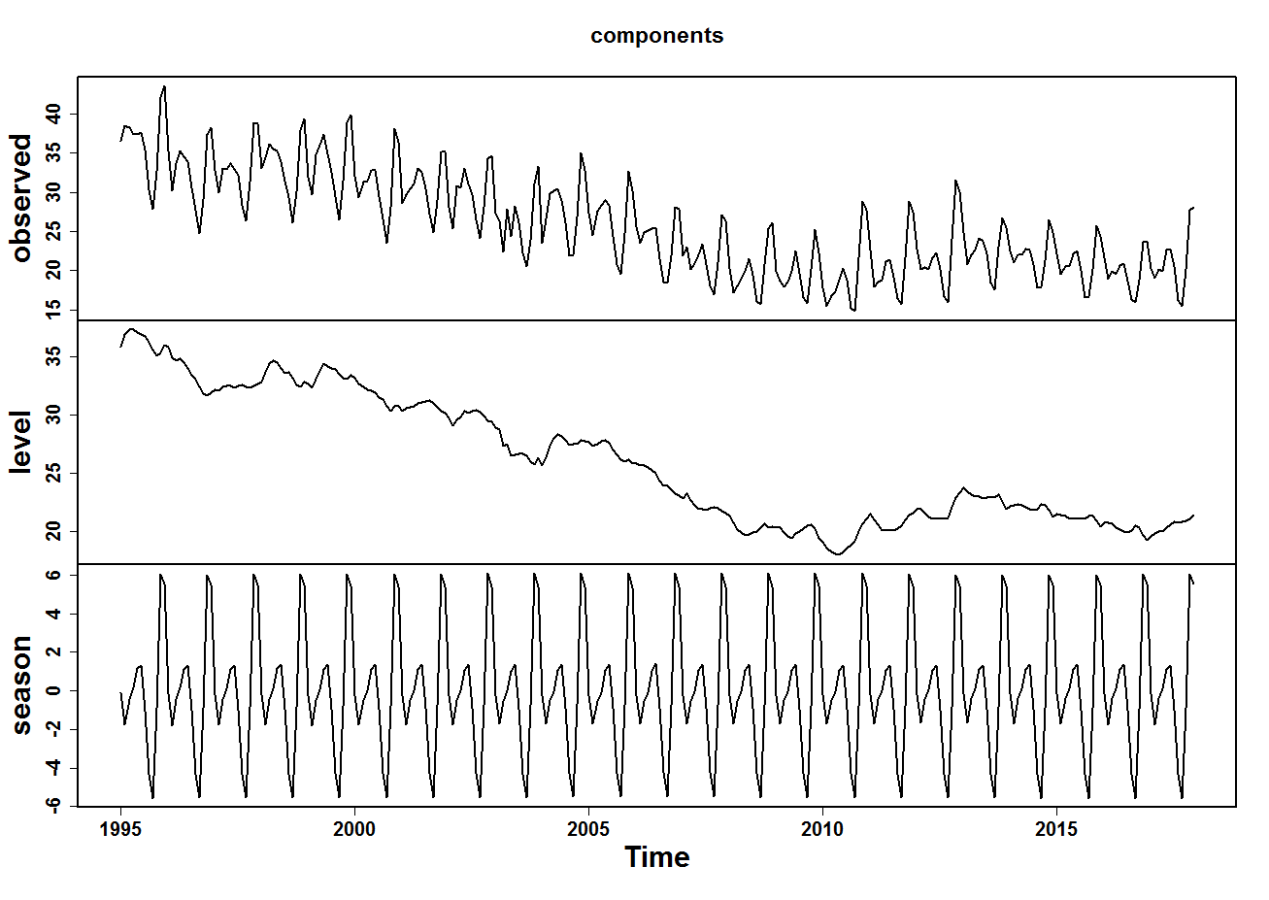


**Figure S9.** The extracted level and seasonal components for the data between January 1995 and December 2017 using the TBATS(0.289, {0,3}, -, {<12,4>}) model.


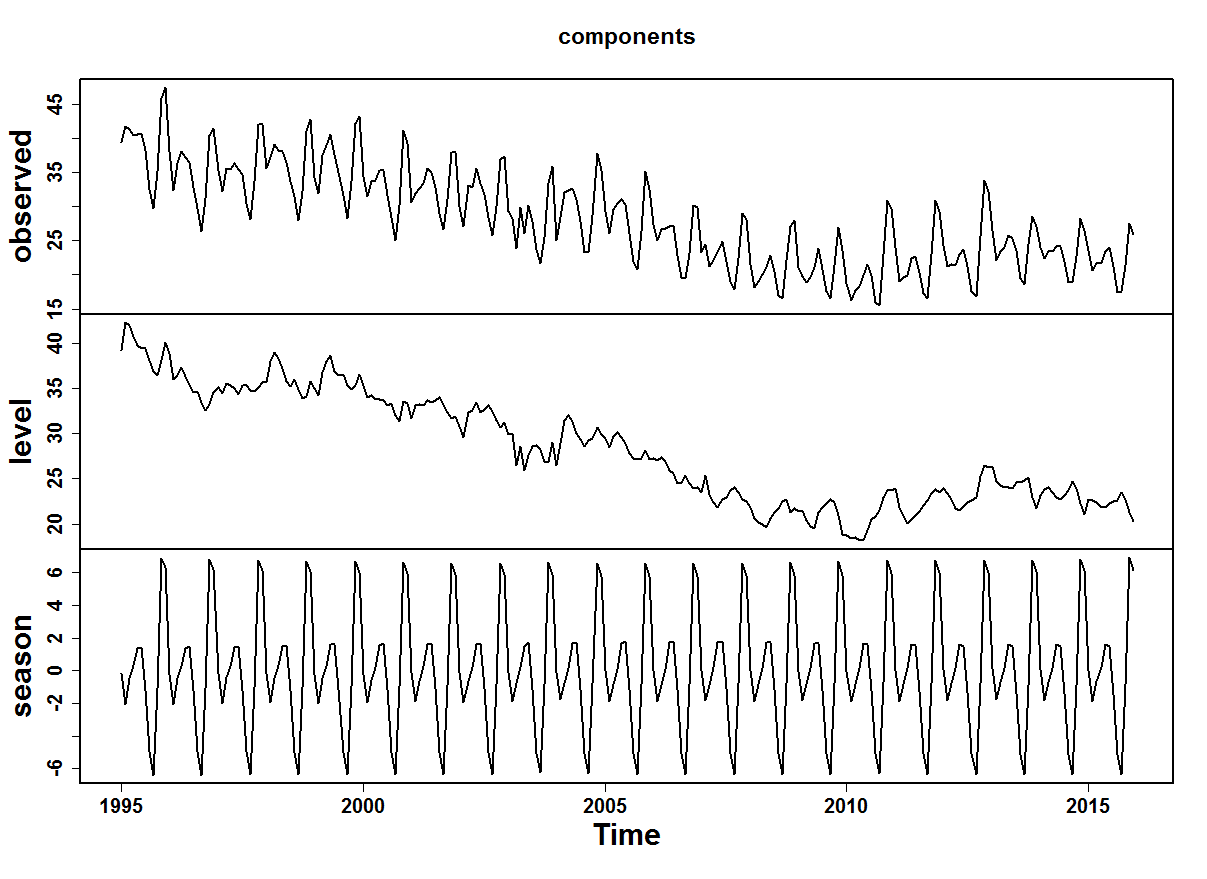


**Figure S10.** The extracted level and seasonal components for the data between January 1995 and December 2015using the TBATS(0.302, {0,0}, -, {<12,4>}) model.


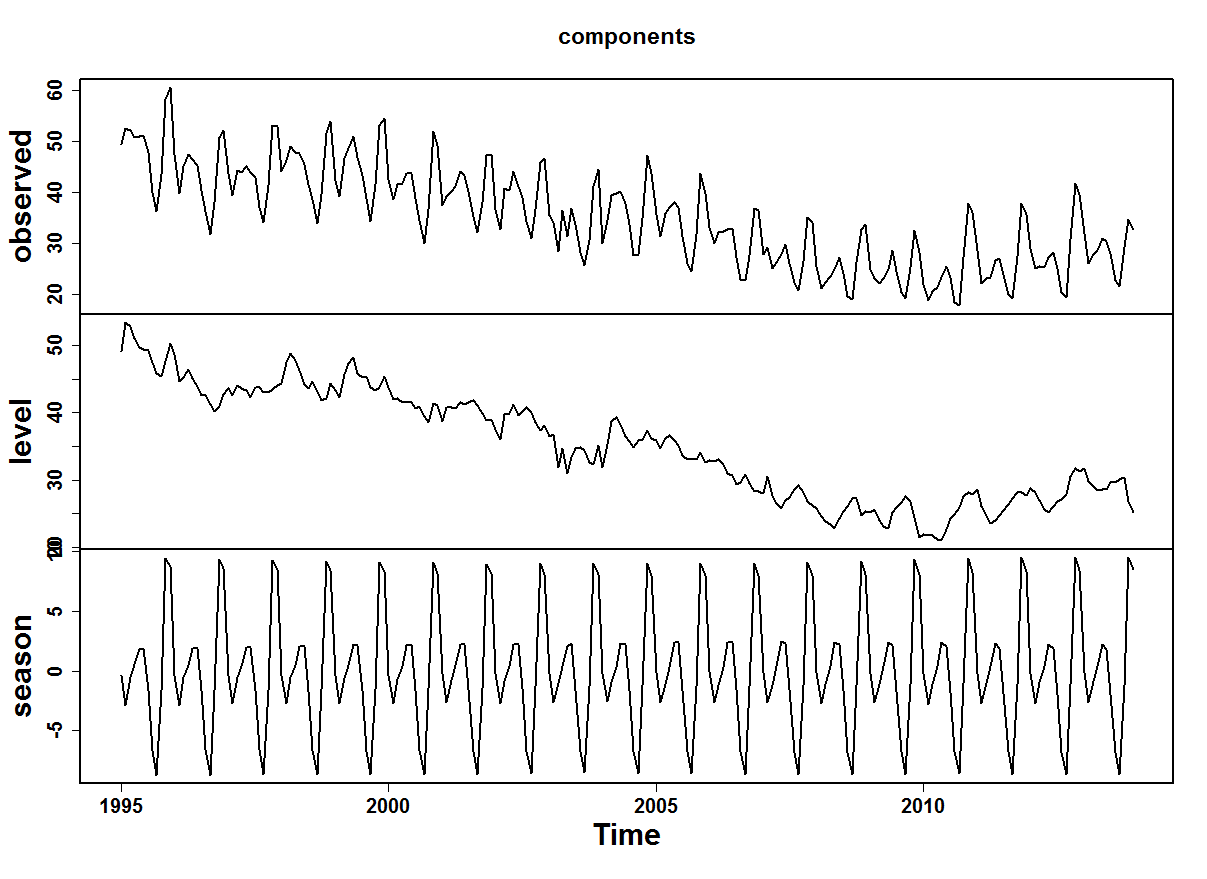


**Figure S11.** The extracted level and seasonal components for the data between January 1995 and December 2013using the TBATS(0.34, {0,0}, -, {<12,4>}) model.


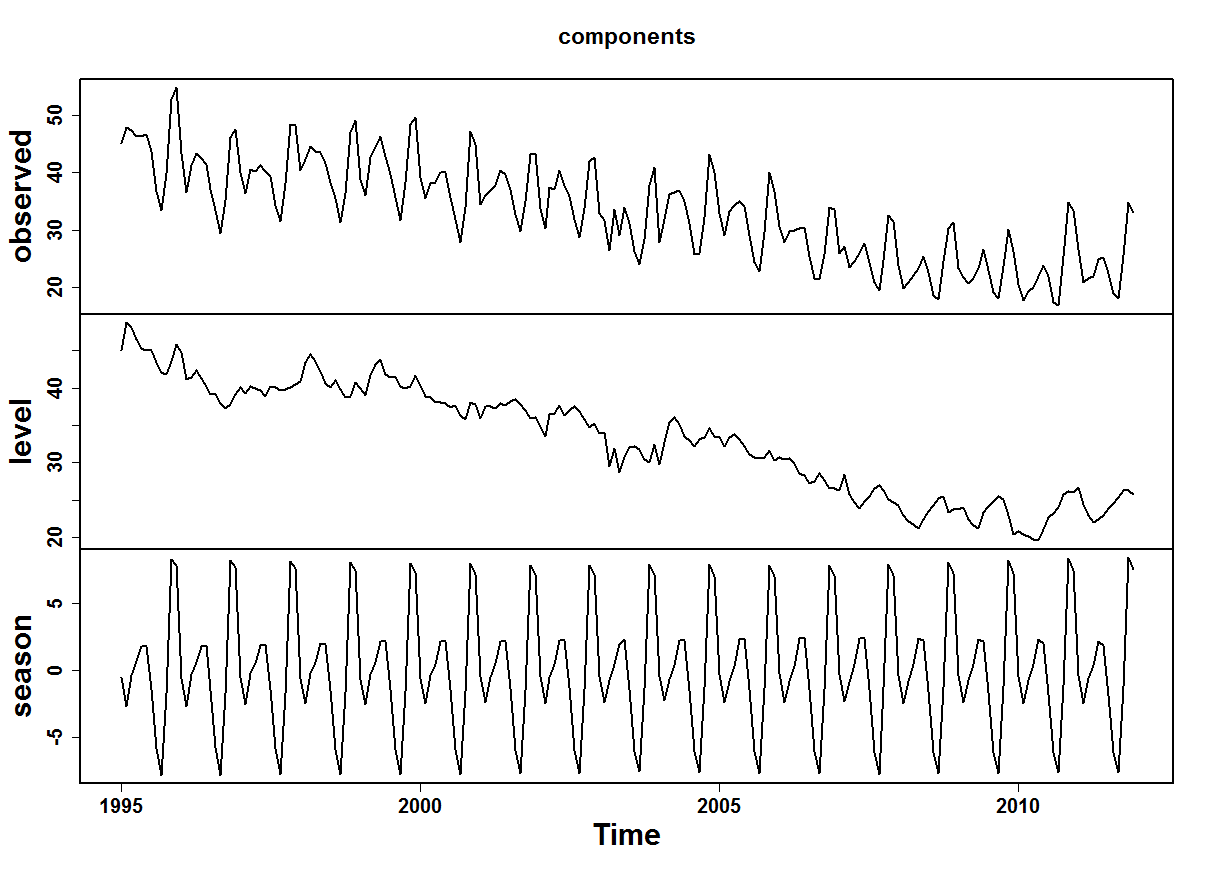


**Figure S12.** The extracted level and seasonal components for the data between January 1995 and December 2011using the TBATS(0.325, {0,0}, -, {<12,4>}) model.

**Figure S13.** The extracted seasonal factors from the predicted HFRS incidence between January 2021 and December 2030 using the multiplicative seasonal decomposition. As displayed, the predicted HFRS incidence in the ten years to come had similar seasonal patterns to that during 1995-2020, a weak peak in May-June, and a strong one in November-December.

**Table S1** Projection into the next 12 months with the best TBATS(0.27, {0,0}, -, {<12,4>}) model and SARIMA(0,1,(1,3))(0,1,1)12 models

| Time | Observed values | TBATS(0.27, {0,0}, -, {<12,4>}) model | | |  | SARIMA(0,1,(1,3))(0,1,1)12 | | |
| --- | --- | --- | --- | --- | --- | --- | --- | --- |
| Forecasts | Lower 95% CI | Upper 95% CI |  | Forecasts | Lower 95% CI | Upper 95% CI |
| Jan-20 | 684 | 665 | 438 | 967 |  | 866 | 631 | 1161 |
| Feb-20 | 374 | 512 | 299 | 820 |  | 578 | 396 | 817 |
| Mar-20 | 433 | 596 | 328 | 995 |  | 677 | 438 | 1000 |
| Apr-20 | 540 | 661 | 346 | 1146 |  | 681 | 433 | 1022 |
| May-20 | 686 | 802 | 411 | 1412 |  | 881 | 550 | 1341 |
| Jun-20 | 826 | 809 | 392 | 1480 |  | 902 | 553 | 1392 |
| Jul-20 | 503 | 547 | 229 | 1108 |  | 653 | 394 | 1022 |
| Aug-20 | 313 | 307 | 101 | 722 |  | 389 | 231 | 617 |
| Sep-20 | 320 | 251 | 71 | 642 |  | 359 | 209 | 576 |
| Oct-20 | 611 | 585 | 212 | 1297 |  | 684 | 393 | 1110 |
| Nov-20 | 1796 | 1485 | 667 | 2867 |  | 1526 | 863 | 2508 |
| Dec-20 | 1460 | 1388 | 591 | 2775 |  | 1374 | 765 | 2283 |

SARIMA seasonal autoregressive integrated moving average method, TBATS an advanced innovation state-space modeling framework by combining Box-Cox transformations, Fourier series with time-varying coefficients and autoregressive moving average error correction, CI confidence interval.

**Table S2** Projection into the next 24 months with the best SARIMA(1,1,(2,3))(0,1,1)12 and TBATS(0.285, {3,0}, -, {<12,4>}) models

| Time | Observed values | TBATS(0.285, {3,0}, -, {<12,4>}) model | | |  | SARIMA(1,1,(2,3))(0,1,1)12 model | | |
| --- | --- | --- | --- | --- | --- | --- | --- | --- |
| Forecasts | Lower 95% CI | Upper 95% CI |  | Forecasts | Lower 95% CI | Upper 95% CI |
| Jan-19 | 1109 | 888 | 604 | 1256 |  | 1132 | 818 | 1527 |
| Feb-19 | 705 | 726 | 441 | 1122 |  | 728 | 494 | 1037 |
| Mar-19 | 738 | 885 | 526 | 1392 |  | 930 | 598 | 1384 |
| Apr-19 | 701 | 967 | 567 | 1537 |  | 939 | 592 | 1418 |
| May-19 | 939 | 1135 | 669 | 1797 |  | 1207 | 741 | 1863 |
| Jun-19 | 1007 | 1160 | 673 | 1857 |  | 1214 | 728 | 1907 |
| Jul-19 | 703 | 822 | 440 | 1398 |  | 891 | 522 | 1425 |
| Aug-19 | 411 | 483 | 225 | 903 |  | 534 | 306 | 869 |
| Sep-19 | 346 | 394 | 170 | 775 |  | 508 | 285 | 840 |
| Oct-19 | 649 | 843 | 428 | 1488 |  | 972 | 534 | 1632 |
| Nov-19 | 1445 | 2008 | 1179 | 3187 |  | 2175 | 1171 | 3706 |
| Dec-19 | 1364 | 1883 | 1079 | 3045 |  | 1926 | 1017 | 3330 |
| Jan-20 | 684 | 940 | 463 | 1692 |  | 1201 | 606 | 2147 |
| Feb-20 | 374 | 754 | 347 | 1423 |  | 794 | 387 | 1453 |
| Mar-20 | 433 | 894 | 421 | 1660 |  | 980 | 463 | 1836 |
| Apr-20 | 540 | 969 | 457 | 1797 |  | 1003 | 462 | 1912 |
| May-20 | 686 | 1134 | 547 | 2074 |  | 1286 | 577 | 2496 |
| Jun-20 | 826 | 1159 | 553 | 2135 |  | 1297 | 568 | 2560 |
| Jul-20 | 503 | 822 | 354 | 1621 |  | 952 | 407 | 1911 |
| Aug-20 | 313 | 483 | 174 | 1065 |  | 572 | 239 | 1167 |
| Sep-20 | 320 | 394 | 129 | 916 |  | 545 | 222 | 1129 |
| Oct-20 | 611 | 843 | 348 | 1708 |  | 1045 | 416 | 2196 |
| Nov-20 | 1796 | 2008 | 1015 | 3555 |  | 2340 | 910 | 4991 |
| Dec-20 | 1460 | 1883 | 928 | 3393 |  | 2075 | 789 | 4491 |

SARIMA seasonal autoregressive integrated moving average method, TBATS an advanced innovation state-space modeling framework by combining Box-Cox transformations, Fourier series with time-varying coefficients and autoregressive moving average error correction, CI confidence interval.

**Table S3** Projection into the next 36 months with the best SARIMA(0,1,(1,3))(0,1,1)12 and TBATS(0.289, {0,3}, -, {<12,4>}) models

| Time | Observed values | TBATS(0.289, {0,3}, -, {<12,4>}) model | | |  | SARIMA(0,1,(1,3))(0,1,1)12 model | | |
| --- | --- | --- | --- | --- | --- | --- | --- | --- |
| Forecasts | Lower 95% CI | Upper 95% CI |  | Forecasts | Lower 95% CI | Upper 95% CI |
| Jan-18 | 1180 | 988 | 678 | 1388 |  | 1208 | 873 | 1629 |
| Feb-18 | 598 | 758 | 459 | 1174 |  | 828 | 561 | 1177 |
| Mar-18 | 874 | 894 | 527 | 1415 |  | 896 | 575 | 1335 |
| Apr-18 | 959 | 968 | 566 | 1540 |  | 897 | 564 | 1356 |
| May-18 | 1253 | 1105 | 646 | 1759 |  | 1137 | 703 | 1745 |
| Jun-18 | 1129 | 1138 | 654 | 1833 |  | 1188 | 721 | 1849 |
| Jul-18 | 815 | 827 | 438 | 1415 |  | 874 | 522 | 1379 |
| Aug-18 | 512 | 494 | 227 | 931 |  | 515 | 302 | 822 |
| Sep-18 | 528 | 398 | 168 | 792 |  | 476 | 275 | 770 |
| Oct-18 | 901 | 835 | 415 | 1494 |  | 944 | 536 | 1547 |
| Nov-18 | 2213 | 2008 | 1164 | 3216 |  | 2044 | 1143 | 3388 |
| Dec-18 | 1700 | 1901 | 1075 | 3101 |  | 1901 | 1047 | 3187 |
| Jan-19 | 1109 | 928 | 445 | 1700 |  | 1164 | 615 | 2013 |
| Feb-19 | 705 | 738 | 328 | 1423 |  | 837 | 430 | 1478 |
| Mar-19 | 738 | 900 | 413 | 1698 |  | 945 | 472 | 1702 |
| Apr-19 | 701 | 968 | 444 | 1827 |  | 946 | 463 | 1730 |
| May-19 | 939 | 1105 | 515 | 2065 |  | 1201 | 575 | 2229 |
| Jun-19 | 1007 | 1138 | 525 | 2140 |  | 1257 | 590 | 2364 |
| Jul-19 | 703 | 827 | 344 | 1663 |  | 926 | 426 | 1766 |
| Aug-19 | 411 | 494 | 171 | 1112 |  | 546 | 246 | 1055 |
| Sep-19 | 346 | 398 | 124 | 951 |  | 505 | 224 | 989 |
| Oct-19 | 649 | 835 | 331 | 1734 |  | 1003 | 436 | 1990 |
| Nov-19 | 1445 | 2008 | 988 | 3618 |  | 2174 | 928 | 4365 |
| Dec-19 | 1364 | 1901 | 912 | 3485 |  | 2024 | 848 | 4112 |
| Jan-20 | 684 | 928 | 361 | 1947 |  | 1242 | 499 | 2593 |
| Feb-20 | 374 | 738 | 262 | 1637 |  | 894 | 349 | 1905 |
| Mar-20 | 433 | 900 | 336 | 1936 |  | 1011 | 383 | 2195 |
| Apr-20 | 540 | 968 | 364 | 2074 |  | 1014 | 375 | 2234 |
| May-20 | 686 | 1105 | 427 | 2328 |  | 1289 | 465 | 2882 |
| Jun-20 | 826 | 1138 | 437 | 2405 |  | 1350 | 476 | 3062 |
| Jul-20 | 503 | 827 | 281 | 1883 |  | 996 | 343 | 2290 |
| Aug-20 | 313 | 494 | 133 | 1275 |  | 588 | 198 | 1370 |
| Sep-20 | 320 | 398 | 94 | 1094 |  | 545 | 180 | 1287 |
| Oct-20 | 611 | 835 | 271 | 1950 |  | 1084 | 350 | 2593 |
| Nov-20 | 1796 | 2008 | 858 | 3974 |  | 2352 | 743 | 5698 |
| Dec-20 | 1460 | 1901 | 790 | 3826 |  | 2193 | 678 | 5377 |

SARIMA seasonal autoregressive integrated moving average method, TBATS an advanced innovation state-space modeling framework by combining Box-Cox transformations, Fourier series with time-varying coefficients and autoregressive moving average error correction, CI confidence interval.

**Table S4** Projection into the next 60 months with the best SARIMA(0,1,1)(0,1,1)12 and TBATS(0.302, {0,0}, -, {<12,4>}) models

| Time | Observed values | TBATS(0.302, {0,0}, -, {<12,4>}) model | | |  | SARIMA(0,1,1)(0,1,1)12 model | | |
| --- | --- | --- | --- | --- | --- | --- | --- | --- |
| Forecasts | Lower 95% CI | Upper 95% CI |  | Forecasts | Lower 95% CI | Upper 95% CI |
| Jan-16 | 949 | 661 | 419 | 986 |  | 841 | 598 | 1150 |
| Feb-16 | 644 | 507 | 277 | 844 |  | 591 | 394 | 853 |
| Mar-16 | 745 | 606 | 312 | 1052 |  | 668 | 421 | 1009 |
| Apr-16 | 699 | 685 | 335 | 1234 |  | 693 | 415 | 1090 |
| May-16 | 828 | 828 | 395 | 1515 |  | 841 | 480 | 1371 |
| Jun-16 | 857 | 813 | 362 | 1557 |  | 896 | 490 | 1510 |
| Jul-16 | 617 | 542 | 199 | 1169 |  | 666 | 349 | 1158 |
| Aug-16 | 420 | 298 | 78 | 768 |  | 402 | 203 | 719 |
| Sep-16 | 394 | 236 | 50 | 676 |  | 381 | 185 | 701 |
| Oct-16 | 631 | 592 | 185 | 1400 |  | 788 | 368 | 1485 |
| Nov-16 | 1248 | 1568 | 658 | 3116 |  | 1598 | 722 | 3088 |
| Dec-16 | 1250 | 1440 | 566 | 2982 |  | 1370 | 598 | 2708 |
| Jan-17 | 785 | 661 | 182 | 1665 |  | 840 | 343 | 1738 |
| Feb-17 | 654 | 507 | 115 | 1405 |  | 593 | 230 | 1266 |
| Mar-17 | 764 | 606 | 143 | 1649 |  | 672 | 249 | 1481 |
| Apr-17 | 742 | 685 | 164 | 1855 |  | 700 | 247 | 1588 |
| May-17 | 1094 | 828 | 208 | 2186 |  | 852 | 287 | 1985 |
| Jun-17 | 1105 | 813 | 193 | 2207 |  | 911 | 294 | 2179 |
| Jul-17 | 812 | 542 | 95 | 1683 |  | 680 | 210 | 1667 |
| Aug-17 | 409 | 298 | 30 | 1142 |  | 411 | 122 | 1034 |
| Sep-17 | 359 | 236 | 17 | 1007 |  | 392 | 112 | 1007 |
| Oct-17 | 764 | 592 | 94 | 1916 |  | 812 | 222 | 2134 |
| Nov-17 | 2021 | 1568 | 429 | 3968 |  | 1653 | 435 | 4437 |
| Dec-17 | 2105 | 1440 | 366 | 3785 |  | 1422 | 360 | 3895 |
| Jan-18 | 1180 | 661 | 99 | 2193 |  | 876 | 208 | 2487 |
| Feb-18 | 598 | 507 | 57 | 1864 |  | 621 | 139 | 1811 |
| Mar-18 | 874 | 606 | 76 | 2146 |  | 707 | 151 | 2118 |
| Apr-18 | 959 | 685 | 91 | 2379 |  | 740 | 150 | 2271 |
| May-18 | 1253 | 828 | 123 | 2759 |  | 904 | 174 | 2841 |
| Jun-18 | 1129 | 813 | 114 | 2770 |  | 970 | 178 | 3122 |
| Jul-18 | 815 | 542 | 49 | 2142 |  | 727 | 127 | 2392 |
| Aug-18 | 512 | 298 | 11 | 1488 |  | 442 | 74 | 1486 |
| Sep-18 | 528 | 236 | 5 | 1319 |  | 423 | 67 | 1450 |
| Oct-18 | 901 | 592 | 51 | 2388 |  | 880 | 133 | 3079 |
| Nov-18 | 2213 | 1568 | 296 | 4727 |  | 1800 | 261 | 6419 |
| Dec-18 | 1700 | 1440 | 249 | 4507 |  | 1555 | 215 | 5647 |
| Jan-19 | 1109 | 661 | 55 | 2684 |  | 964 | 124 | 3605 |
| Feb-19 | 705 | 507 | 29 | 2297 |  | 686 | 83 | 2627 |
| Mar-19 | 738 | 606 | 41 | 2614 |  | 786 | 90 | 3077 |
| Apr-19 | 701 | 685 | 52 | 2873 |  | 826 | 89 | 3305 |
| May-19 | 939 | 828 | 74 | 3297 |  | 1015 | 103 | 4143 |
| Jun-19 | 1007 | 813 | 68 | 3301 |  | 1095 | 105 | 4562 |
| Jul-19 | 703 | 542 | 26 | 2582 |  | 825 | 75 | 3502 |
| Aug-19 | 411 | 298 | 4 | 1827 |  | 504 | 43 | 2180 |
| Sep-19 | 346 | 236 | 1 | 1627 |  | 485 | 40 | 2133 |
| Oct-19 | 649 | 592 | 27 | 2842 |  | 1014 | 78 | 4540 |
| Nov-19 | 1445 | 1568 | 208 | 5442 |  | 2085 | 153 | 9487 |
| Dec-19 | 1364 | 1440 | 173 | 5191 |  | 1810 | 126 | 8367 |
| Jan-20 | 684 | 661 | 31 | 3159 |  | 1129 | 72 | 5345 |
| Feb-20 | 374 | 507 | 14 | 2719 |  | 809 | 49 | 3902 |
| Mar-20 | 433 | 606 | 22 | 3069 |  | 932 | 52 | 4580 |
| Apr-20 | 540 | 685 | 29 | 3353 |  | 986 | 52 | 4929 |
| May-20 | 686 | 828 | 44 | 3818 |  | 1217 | 60 | 6191 |
| Jun-20 | 826 | 813 | 41 | 3817 |  | 1322 | 61 | 6832 |
| Jul-20 | 503 | 542 | 13 | 3014 |  | 1002 | 43 | 5258 |
| Aug-20 | 313 | 298 | 1 | 2165 |  | 616 | 25 | 3281 |
| Sep-20 | 320 | 236 | 0 | 1936 |  | 596 | 23 | 3218 |
| Oct-20 | 611 | 592 | 14 | 3290 |  | 1254 | 45 | 6865 |
| Nov-20 | 1796 | 1568 | 148 | 6133 |  | 2593 | 87 | 14380 |
| Dec-20 | 1460 | 1440 | 120 | 5853 |  | 2265 | 72 | 12716 |

SARIMA seasonal autoregressive integrated moving average method, TBATS an advanced innovation state-space modeling framework by combining Box-Cox transformations, Fourier series with time-varying coefficients and autoregressive moving average error correction, CI confidence interval.

**Table S5** Projection into the next 84 months with the best SARIMA(1,0,0)(0,1,1)12and TBATS(0.34, {0,0}, -, {<12,4>}) models

| Time | Observed values | TBATS(0.34, {0,0}, -, {<12,4>}) model | | |  | SARIMA(1,0,0)(0,1,1)12model | | |
| --- | --- | --- | --- | --- | --- | --- | --- | --- |
| Forecasts | Lower 95% CI | Upper 95% CI |  | Forecasts | Lower 95% CI | Upper 95% CI |
| Jan-14 | 1072 | 744 | 465 | 1116 |  | 606 | -240 | 1453 |
| Feb-14 | 876 | 567 | 299 | 958 |  | 194 | -844 | 1232 |
| Mar-14 | 1008 | 694 | 346 | 1218 |  | 299 | -823 | 1421 |
| Apr-14 | 1008 | 793 | 375 | 1438 |  | 358 | -804 | 1520 |
| May-14 | 1106 | 949 | 439 | 1747 |  | 570 | -611 | 1751 |
| Jun-14 | 1095 | 914 | 390 | 1768 |  | 617 | -574 | 1808 |
| Jul-14 | 836 | 609 | 206 | 1341 |  | 361 | -835 | 1557 |
| Aug-14 | 541 | 335 | 75 | 900 |  | 11 | -1187 | 1209 |
| Sep-14 | 544 | 256 | 42 | 782 |  | -47 | -1246 | 1152 |
| Oct-14 | 910 | 667 | 189 | 1608 |  | 620 | -580 | 1819 |
| Nov-14 | 1744 | 1812 | 750 | 3566 |  | 1722 | 522 | 2922 |
| Dec-14 | 1454 | 1665 | 641 | 3419 |  | 1416 | 215 | 2616 |
| Jan-15 | 1016 | 744 | 185 | 1906 |  | 454 | -800 | 1709 |
| Feb-15 | 700 | 567 | 110 | 1615 |  | 27 | -1254 | 1309 |
| Mar-15 | 809 | 694 | 145 | 1918 |  | 122 | -1173 | 1416 |
| Apr-15 | 808 | 793 | 171 | 2164 |  | 174 | -1127 | 1474 |
| May-15 | 1011 | 949 | 218 | 2520 |  | 380 | -924 | 1684 |
| Jun-15 | 1077 | 914 | 194 | 2509 |  | 424 | -882 | 1729 |
| Jul-15 | 760 | 609 | 88 | 1938 |  | 165 | -1142 | 1472 |
| Aug-15 | 438 | 335 | 22 | 1347 |  | -187 | -1494 | 1120 |
| Sep-15 | 447 | 256 | 9 | 1177 |  | -246 | -1554 | 1061 |
| Oct-15 | 777 | 667 | 86 | 2203 |  | 419 | -888 | 1727 |
| Nov-15 | 1614 | 1812 | 478 | 4517 |  | 1521 | 214 | 2828 |
| Dec-15 | 1355 | 1665 | 404 | 4317 |  | 1214 | -93 | 2522 |
| Jan-16 | 949 | 744 | 90 | 2511 |  | 253 | -1103 | 1608 |
| Feb-16 | 644 | 567 | 47 | 2145 |  | -174 | -1553 | 1205 |
| Mar-16 | 745 | 694 | 69 | 2493 |  | -80 | -1471 | 1310 |
| Apr-16 | 699 | 793 | 86 | 2768 |  | -29 | -1425 | 1368 |
| May-16 | 828 | 949 | 119 | 3170 |  | 178 | -1222 | 1577 |
| Jun-16 | 857 | 914 | 104 | 3143 |  | 221 | -1180 | 1622 |
| Jul-16 | 617 | 609 | 39 | 2464 |  | -37 | -1439 | 1364 |
| Aug-16 | 420 | 335 | 5 | 1757 |  | -389 | -1791 | 1013 |
| Sep-16 | 394 | 256 | 1 | 1546 |  | -449 | -1851 | 954 |
| Oct-16 | 631 | 667 | 40 | 2741 |  | 217 | -1185 | 1619 |
| Nov-16 | 1248 | 1812 | 320 | 5353 |  | 1319 | -84 | 2721 |
| Dec-16 | 1250 | 1665 | 265 | 5114 |  | 1012 | -391 | 2414 |
| Jan-17 | 785 | 744 | 44 | 3066 |  | 50 | -1397 | 1498 |
| Feb-17 | 654 | 567 | 19 | 2639 |  | -377 | -1846 | 1093 |
| Mar-17 | 764 | 694 | 32 | 3027 |  | -283 | -1763 | 1198 |
| Apr-17 | 742 | 793 | 43 | 3331 |  | -231 | -1717 | 1255 |
| May-17 | 1094 | 949 | 65 | 3774 |  | -25 | -1513 | 1464 |
| Jun-17 | 1105 | 914 | 56 | 3735 |  | 19 | -1471 | 1509 |
| Jul-17 | 812 | 609 | 15 | 2964 |  | -240 | -1730 | 1251 |
| Aug-17 | 409 | 335 | 1 | 2155 |  | -592 | -2083 | 899 |
| Sep-17 | 359 | 256 | 0 | 1907 |  | -651 | -2142 | 840 |
| Oct-17 | 764 | 667 | 17 | 3255 |  | 15 | -1476 | 1506 |
| Nov-17 | 2021 | 1812 | 217 | 6133 |  | 1116 | -375 | 2607 |
| Dec-17 | 2105 | 1665 | 176 | 5863 |  | 810 | -682 | 2301 |
| Jan-18 | 1180 | 744 | 20 | 3599 |  | -152 | -1686 | 1382 |
| Feb-18 | 598 | 567 | 6 | 3117 |  | -579 | -2133 | 975 |
| Mar-18 | 874 | 694 | 13 | 3543 |  | -485 | -2050 | 1080 |
| Apr-18 | 959 | 793 | 20 | 3873 |  | -433 | -2003 | 1137 |
| May-18 | 1253 | 949 | 34 | 4355 |  | -227 | -1799 | 1346 |
| Jun-18 | 1129 | 914 | 28 | 4306 |  | -183 | -1757 | 1390 |
| Jul-18 | 815 | 609 | 5 | 3451 |  | -442 | -2017 | 1132 |
| Aug-18 | 512 | 335 | 0 | 2547 |  | -794 | -2369 | 781 |
| Sep-18 | 528 | 256 | 0 | 2266 |  | -853 | -2428 | 722 |
| Oct-18 | 901 | 667 | 6 | 3756 |  | -188 | -1763 | 1387 |
| Nov-18 | 2213 | 1812 | 147 | 6880 |  | 914 | -661 | 2489 |
| Dec-18 | 1700 | 1665 | 116 | 6582 |  | 607 | -968 | 2182 |
| Jan-19 | 1109 | 744 | 8 | 4119 |  | -354 | -1970 | 1261 |
| Feb-19 | 705 | 567 | 1 | 3587 |  | -782 | -2416 | 853 |
| Mar-19 | 738 | 694 | 4 | 4048 |  | -687 | -2332 | 957 |
| Apr-19 | 701 | 793 | 8 | 4403 |  | -636 | -2285 | 1014 |
| May-19 | 939 | 949 | 16 | 4922 |  | -429 | -2082 | 1223 |
| Jun-19 | 1007 | 914 | 13 | 4863 |  | -386 | -2039 | 1268 |
| Jul-19 | 703 | 609 | 1 | 3930 |  | -645 | -2299 | 1010 |
| Aug-19 | 411 | 335 | 0 | 2938 |  | -996 | -2651 | 658 |
| Sep-19 | 346 | 256 | 0 | 2625 |  | -1056 | -2710 | 599 |
| Oct-19 | 649 | 667 | 1 | 4250 |  | -390 | -2045 | 1265 |
| Nov-19 | 1445 | 1812 | 98 | 7605 |  | 711 | -943 | 2366 |
| Dec-19 | 1364 | 1665 | 75 | 7281 |  | 405 | -1250 | 2059 |
| Jan-20 | 684 | 744 | 2 | 4631 |  | -557 | -2250 | 1136 |
| Feb-20 | 374 | 567 | 0 | 4052 |  | -984 | -2696 | 728 |
| Mar-20 | 433 | 694 | 1 | 4547 |  | -890 | -2611 | 831 |
| Apr-20 | 540 | 793 | 2 | 4926 |  | -838 | -2564 | 888 |
| May-20 | 686 | 949 | 7 | 5480 |  | -632 | -2360 | 1097 |
| Jun-20 | 826 | 914 | 5 | 5413 |  | -588 | -2318 | 1141 |
| Jul-20 | 503 | 609 | 0 | 4406 |  | -847 | -2577 | 883 |
| Aug-20 | 313 | 335 | 0 | 3329 |  | -1199 | -2929 | 532 |
| Sep-20 | 320 | 256 | 0 | 2987 |  | -1258 | -2989 | 472 |
| Oct-20 | 611 | 667 | 0 | 4740 |  | -592 | -2323 | 1138 |
| Nov-20 | 1796 | 1812 | 64 | 8315 |  | 509 | -1222 | 2240 |
| Dec-20 | 1460 | 1665 | 47 | 7967 |  | 202 | -1528 | 1933 |

SARIMA seasonal autoregressive integrated moving average method, TBATS an advanced innovation state-space modeling framework by combining Box-Cox transformations, Fourier series with time-varying coefficients and autoregressive moving average error correction, CI confidence interval.

**Table S6** Projection into the next 108 months with the best SARIMA(1,0,0)(0,1,1)12 and TBATS(0.325, {0,0}, -, {<12,4>}) models

| Time | Observed values | TBATS(0.325, {0,0}, -, {<12,4>}) model | | |  | SARIMA(1,0,0)(0,1,1)12 model | | |
| --- | --- | --- | --- | --- | --- | --- | --- | --- |
| Forecasts | Lower 95% CI | Upper 95% CI |  | Forecasts | Lower 95% CI | Upper 95% CI |
| Jan-12 | 1115 | 942 | 617 | 1367 |  | 819 | -56 | 1694 |
| Feb-12 | 765 | 754 | 434 | 1206 |  | 341 | -706 | 1389 |
| Mar-12 | 793 | 924 | 506 | 1530 |  | 285 | -829 | 1399 |
| Apr-12 | 773 | 1026 | 534 | 1758 |  | 264 | -878 | 1406 |
| May-12 | 947 | 1224 | 624 | 2126 |  | 396 | -757 | 1550 |
| Jun-12 | 1044 | 1186 | 566 | 2153 |  | 487 | -672 | 1645 |
| Jul-12 | 765 | 790 | 313 | 1608 |  | 188 | -973 | 1348 |
| Aug-12 | 447 | 466 | 138 | 1112 |  | -111 | -1273 | 1050 |
| Sep-12 | 395 | 378 | 92 | 992 |  | -169 | -1331 | 993 |
| Oct-12 | 1296 | 854 | 291 | 1892 |  | 378 | -784 | 1540 |
| Nov-12 | 3000 | 2155 | 973 | 4053 |  | 1565 | 403 | 2727 |
| Dec-12 | 2578 | 2007 | 855 | 3912 |  | 1286 | 124 | 2448 |
| Jan-13 | 1437 | 942 | 287 | 2213 |  | 300 | -917 | 1518 |
| Feb-13 | 848 | 754 | 195 | 1923 |  | -81 | -1321 | 1159 |
| Mar-13 | 998 | 924 | 252 | 2298 |  | -74 | -1324 | 1176 |
| Apr-13 | 1081 | 1026 | 282 | 2544 |  | -54 | -1308 | 1201 |
| May-13 | 1318 | 1224 | 352 | 2966 |  | 106 | -1150 | 1363 |
| Jun-13 | 1260 | 1186 | 321 | 2959 |  | 215 | -1042 | 1472 |
| Jul-13 | 1023 | 790 | 160 | 2248 |  | -73 | -1330 | 1185 |
| Aug-13 | 592 | 466 | 58 | 1597 |  | -364 | -1621 | 894 |
| Sep-13 | 517 | 378 | 35 | 1426 |  | -416 | -1674 | 841 |
| Oct-13 | 1136 | 854 | 158 | 2526 |  | 134 | -1124 | 1392 |
| Nov-13 | 1811 | 2155 | 660 | 5058 |  | 1323 | 66 | 2581 |
| Dec-13 | 1547 | 2007 | 576 | 4865 |  | 1046 | -212 | 2304 |
| Jan-14 | 1072 | 942 | 163 | 2855 |  | 61 | -1247 | 1369 |
| Feb-14 | 876 | 754 | 104 | 2494 |  | -320 | -1648 | 1009 |
| Mar-14 | 1008 | 924 | 144 | 2921 |  | -312 | -1650 | 1026 |
| Apr-14 | 1008 | 1026 | 167 | 3193 |  | -291 | -1633 | 1050 |
| May-14 | 1106 | 1224 | 219 | 3666 |  | -131 | -1475 | 1212 |
| Jun-14 | 1095 | 1186 | 199 | 3643 |  | -23 | -1367 | 1321 |
| Jul-14 | 836 | 790 | 88 | 2807 |  | -310 | -1655 | 1034 |
| Aug-14 | 541 | 466 | 25 | 2036 |  | -601 | -1946 | 744 |
| Sep-14 | 544 | 378 | 13 | 1826 |  | -654 | -1999 | 691 |
| Oct-14 | 910 | 854 | 89 | 3096 |  | -103 | -1448 | 1241 |
| Nov-14 | 1744 | 2155 | 471 | 5939 |  | 1086 | -259 | 2431 |
| Dec-14 | 1454 | 2007 | 407 | 5709 |  | 809 | -536 | 2153 |
| Jan-15 | 1016 | 942 | 96 | 3441 |  | -176 | -1568 | 1216 |
| Feb-15 | 700 | 754 | 56 | 3022 |  | -557 | -1968 | 855 |
| Mar-15 | 809 | 924 | 84 | 3496 |  | -550 | -1970 | 871 |
| Apr-15 | 808 | 1026 | 101 | 3793 |  | -529 | -1953 | 895 |
| May-15 | 1011 | 1224 | 140 | 4314 |  | -369 | -1794 | 1057 |
| Jun-15 | 1077 | 1186 | 126 | 4278 |  | -260 | -1686 | 1166 |
| Jul-15 | 760 | 790 | 48 | 3335 |  | -547 | -1974 | 879 |
| Aug-15 | 438 | 466 | 10 | 2458 |  | -838 | -2265 | 588 |
| Sep-15 | 447 | 378 | 4 | 2213 |  | -891 | -2318 | 535 |
| Oct-15 | 777 | 854 | 50 | 3636 |  | -341 | -1767 | 1086 |
| Nov-15 | 1614 | 2155 | 343 | 6759 |  | 849 | -578 | 2275 |
| Dec-15 | 1355 | 2007 | 293 | 6499 |  | 571 | -855 | 1998 |
| Jan-16 | 949 | 942 | 56 | 4000 |  | -413 | -1884 | 1057 |
| Feb-16 | 644 | 754 | 30 | 3529 |  | -794 | -2284 | 695 |
| Mar-16 | 745 | 924 | 49 | 4048 |  | -787 | -2285 | 711 |
| Apr-16 | 699 | 1026 | 61 | 4368 |  | -766 | -2267 | 735 |
| May-16 | 828 | 1224 | 89 | 4934 |  | -606 | -2109 | 897 |
| Jun-16 | 857 | 1186 | 80 | 4887 |  | -497 | -2001 | 1006 |
| Jul-16 | 617 | 790 | 25 | 3847 |  | -785 | -2288 | 719 |
| Aug-16 | 420 | 466 | 3 | 2872 |  | -1076 | -2579 | 428 |
| Sep-16 | 394 | 378 | 1 | 2596 |  | -1129 | -2632 | 375 |
| Oct-16 | 631 | 854 | 27 | 4162 |  | -578 | -2082 | 926 |
| Nov-16 | 1248 | 2155 | 252 | 7543 |  | 611 | -893 | 2115 |
| Dec-16 | 1250 | 2007 | 212 | 7256 |  | 334 | -1170 | 1838 |
| Jan-17 | 785 | 942 | 32 | 4545 |  | -651 | -2197 | 895 |
| Feb-17 | 654 | 754 | 14 | 4026 |  | -1032 | -2595 | 532 |
| Mar-17 | 764 | 924 | 27 | 4586 |  | -1024 | -2596 | 547 |
| Apr-17 | 742 | 1026 | 35 | 4930 |  | -1003 | -2578 | 571 |
| May-17 | 1094 | 1224 | 56 | 5537 |  | -843 | -2420 | 733 |
| Jun-17 | 1105 | 1186 | 49 | 5481 |  | -735 | -2312 | 842 |
| Jul-17 | 812 | 790 | 12 | 4350 |  | -1022 | -2599 | 555 |
| Aug-17 | 409 | 466 | 1 | 3283 |  | -1313 | -2890 | 264 |
| Sep-17 | 359 | 378 | 0 | 2977 |  | -1366 | -2943 | 211 |
| Oct-17 | 764 | 854 | 14 | 4679 |  | -815 | -2393 | 762 |
| Nov-17 | 2021 | 2155 | 185 | 8304 |  | 374 | -1203 | 1951 |
| Dec-17 | 2105 | 2007 | 153 | 7992 |  | 97 | -1481 | 1674 |
| Jan-18 | 1180 | 942 | 17 | 5080 |  | -888 | -2506 | 730 |
| Feb-18 | 598 | 754 | 6 | 4517 |  | -1269 | -2904 | 366 |
| Mar-18 | 874 | 924 | 14 | 5117 |  | -1262 | -2904 | 380 |
| Apr-18 | 959 | 1026 | 20 | 5482 |  | -1241 | -2886 | 404 |
| May-18 | 1253 | 1224 | 34 | 6129 |  | -1081 | -2727 | 566 |
| Jun-18 | 1129 | 1186 | 29 | 6065 |  | -972 | -2619 | 675 |
| Jul-18 | 815 | 790 | 5 | 4847 |  | -1259 | -2907 | 388 |
| Aug-18 | 512 | 466 | 0 | 3693 |  | -1550 | -3198 | 97 |
| Sep-18 | 528 | 378 | 0 | 3359 |  | -1603 | -3251 | 44 |
| Oct-18 | 901 | 854 | 6 | 5190 |  | -1053 | -2700 | 595 |
| Nov-18 | 2213 | 2155 | 135 | 9048 |  | 137 | -1511 | 1784 |
| Dec-18 | 1700 | 2007 | 110 | 8712 |  | -141 | -1788 | 1507 |
| Jan-19 | 1109 | 942 | 8 | 5610 |  | -1125 | -2812 | 561 |
| Feb-19 | 705 | 754 | 2 | 5004 |  | -1506 | -3209 | 196 |
| Mar-19 | 738 | 924 | 7 | 5642 |  | -1499 | -3209 | 211 |
| Apr-19 | 701 | 1026 | 10 | 6028 |  | -1478 | -3191 | 235 |
| May-19 | 939 | 1224 | 20 | 6714 |  | -1318 | -3032 | 396 |
| Jun-19 | 1007 | 1186 | 17 | 6643 |  | -1209 | -2924 | 505 |
| Jul-19 | 703 | 790 | 2 | 5342 |  | -1497 | -3212 | 218 |
| Aug-19 | 411 | 466 | 0 | 4104 |  | -1788 | -3503 | -73 |
| Sep-19 | 346 | 378 | 0 | 3742 |  | -1841 | -3556 | -126 |
| Oct-19 | 649 | 854 | 2 | 5699 |  | -1290 | -3005 | 425 |
| Nov-19 | 1445 | 2155 | 97 | 9780 |  | -101 | -1816 | 1614 |
| Dec-19 | 1364 | 2007 | 77 | 9422 |  | -378 | -2093 | 1337 |
| Jan-20 | 684 | 942 | 3 | 6137 |  | -1363 | -3115 | 389 |
| Feb-20 | 374 | 754 | 1 | 5489 |  | -1744 | -3511 | 24 |
| Mar-20 | 433 | 924 | 3 | 6165 |  | -1736 | -3511 | 38 |
| Apr-20 | 540 | 1026 | 5 | 6572 |  | -1715 | -3493 | 62 |
| May-20 | 686 | 1224 | 11 | 7294 |  | -1555 | -3334 | 224 |
| Jun-20 | 826 | 1186 | 9 | 7216 |  | -1447 | -3226 | 333 |
| Jul-20 | 503 | 790 | 0 | 5835 |  | -1734 | -3514 | 46 |
| Aug-20 | 313 | 466 | 0 | 4516 |  | -2025 | -3805 | -245 |
| Sep-20 | 320 | 378 | 0 | 4127 |  | -2078 | -3858 | -298 |
| Oct-20 | 611 | 854 | 1 | 6206 |  | -1527 | -3307 | 252 |
| Nov-20 | 1796 | 2155 | 69 | 10503 |  | -338 | -2118 | 1442 |
| Dec-20 | 1460 | 2007 | 54 | 10124 |  | -615 | -2395 | 1164 |

SARIMA seasonal autoregressive integrated moving average method, TBATS an advanced innovation state-space modeling framework by combining Box-Cox transformations, Fourier series with time-varying coefficients and autoregressive moving average error correction, CI confidence interval.

**Table S7** The best TBATS models obtained on the basis of different datasets and their key parameters

| Parameters | | 12-step ahead forecasting | | | |  | | 24-step ahead forecasting | | |  | 36-step ahead forecasting |
| --- | --- | --- | --- | --- | --- | --- | --- | --- | --- | --- | --- | --- |
| TBATS(0.27, {0,0}, -, {<12,4>}) model | | | |  | | TBATS(0.285, {3,0}, -, {<12,4>}) model | | |  | TBATS(0.285, {3,0}, -, {<12,4>}) model |
| Lambda | | 0.2704 | | | |  | | 0.2846 | | |  | 0.2889 |
| Alpha | | 0.6414 | | | |  | | 0.2214 | | |  | 0.2452 |
| Beta | | _ | | | |  | | _ | | |  |  |
| Damping Parameter | | _ | | | |  | | _ | | |  |  |
| Gamma-1 Values | | -0.0017 | | | |  | | -0.0015 | | |  | -0.0022 |
| Gamma-2 Values | | 0.0040 | | | |  | | 0.0044 | | |  | 0.0018 |
| AR coefficients | | _ | | | |  | | AR1=0.4497, AR2=0.0229, AR3=-0.0639 | | |  | AR1=0.4451, AR2=0.2063, AR3=-0.0471 |
| Seed states | | | |  | | | | | | |  |  |
| 1 | | 31.9594 | | | |  | | 34.6612 | | |  | 35.5307 |
| 2 | | 1.7462 | | | |  | | 1.9328 | | |  | 1.9930 |
| 3 | | -0.0611 | | | |  | | -0.0973 | | |  | -0.0920 |
| 4 | | -1.2964 | | | |  | | -1.4579 | | |  | -1.5238 |
| 5 | | -0.3968 | | | |  | | -0.4554 | | |  | -0.4829 |
| 6 | | 0.0605 | | | |  | | 0.0630 | | |  | 0.0717 |
| 7 | | -3.3218 | | | |  | | -3.6860 | | |  | -3.7722 |
| 8 | | -0.3808 | | | |  | | -0.4471 | | |  | -0.4634 |
| 9 | | 0.0241 | | | |  | | 0.0256 | | |  | 0.0232 |
| 10 | | _ | | | |  | | 0.0000 | | |  | 0.0000 |
| 11 | | _ | | | |  | | 0.0000 | | |  | 0.0000 |
| 12 | | _ | | | |  | | _ | | |  | 0.0000 |
| Sigma | | 1.1675 | | | |  | | 1.2841 | | |  | 1.3359 |
| AIC | | 5012.207 | | | |  | | 4818.873 | | |  | 4619.619 |
| Parameters | 60-step ahead forecasting | | | |  | | 84-step ahead forecasting | |  | 108-step ahead forecasting | | |
| TBATS(0.302, {0,0}, -, {<12,4>}) model | | | |  | | TBATS(0.34, {0,0}, -, {<12,4>}) model | |  | TBATS(0.325, {0,0}, -, {<12,4>}) model | | |
| Lambda | 0.3022 | | | |  | | 0.3400 | |  | 0.3250 | | |
| Alpha | 0.6629 | | | |  | | 0.6765 | |  | 0.6576 | | |
| Gamma-1 Values | -0.0015 | | | |  | | -0.0013 | |  | -0.0034 | | |
| Gamma-2 Values | 0.0054 | | | |  | | 0.0066 | |  | 0.0090 | | |
| Seed states | | |  | | | | | |  |  | | |
| 1 | 38.3808 | | | |  | | 47.9848 | |  | 43.8811 | | |
| 2 | 2.2468 | | | |  | | 3.0654 | |  | 2.6604 | | |
| 3 | -0.1388 | | | |  | | -0.1931 | |  | -0.1845 | | |
| 4 | -1.7558 | | | |  | | -2.4496 | |  | -2.2278 | | |
| 5 | -0.5457 | | | |  | | -0.8079 | |  | -0.8017 | | |
| 6 | 0.0917 | | | |  | | 0.1177 | |  | 0.2125 | | |
| 7 | -4.3099 | | | |  | | -5.8943 | |  | -5.2655 | | |
| 8 | -0.5531 | | | |  | | 0.0550 | |  | -0.8544 | | |
| 9 | 0.0407 | | | |  | | _ | |  | 0.0212 | | |
| Sigma | 1.5451 | | | |  | | 2.1023 | |  | 1.8690 | | |
| AIC | 4232.158 | | | |  | | 3840.067 | |  | 3430.025 | | |

TBATS an advanced innovation state-space modeling framework by combining Box-Cox transformations, Fourier series with time-varying coefficients and autoregressive moving average error correction, AR1 autoregressive method at lag1, AR2 autoregressive method at lag2, AR3 autoregressive method at lag3, AR4 autoregressive method at lag4, AIC Akaike's Information Criterion.

**Table S8** Comparisons of the out-of-sample forecasting powers between TBATS models and SARIMA models, along with ETS models

| Models | Testing power | | | | |
| --- | --- | --- | --- | --- | --- |
| MAD | MAPE | RMSE | MER | RMSPE |
| 12-data ahead forecasting | | | | | |
| SARIMA | 144.734 | 25.049 | 161.671 | 0.203 | 0.296 |
| TBATS | 91.799 | 14.772 | 123.653 | 0.129 | 0.193 |
| ETS | 148.635 | 25.835 | 177.092 | 0.209 | 0.325 |
| Decreased percentage (%) | | | | | |
| TBATS vs. SARIMA | 36.574 | 41.028 | 23.516 | 36.453 | 34.797 |
| TBATS vs. ETS | 38.239 | 42.822 | 30.176 | 38.278 | 40.615 |
| 24-data ahead forecasting | | | | | |
| SARIMA | 357.734 | 53.753 | 406.278 | 0.460 | 0.625 |
| TBATS | 260.619 | 38.407 | 301.441 | 0.335 | 0.469 |
| ETS | 279.014 | 44.604 | 307.731 | 0.359 | 0.536 |
| Decreased percentage (%) | | | | | |
| TBATS vs. SARIMA | 27.147 | 28.549 | 25.804 | 27.174 | 24.960 |
| TBATS vs. ETS | 6.593 | 13.893 | 2.044 | 6.685 | 12.500 |
| 36-data ahead forecasting | | | | | |
| SARIMA | 290.782 | 42.156 | 365.570 | 0.334 | 0.560 |
| TBATS | 204.151 | 28.685 | 254.418 | 0.235 | 0.387 |
| ETS | 297.359 | 44.118 | 347.689 | 0.342 | 0.564 |
| Decreased percentage (%) | | | | | |
| TBATS vs. SARIMA | 29.792 | 31.955 | 30.405 | 29.641 | 30.893 |
| TBATS vs. ETS | 31.345 | 34.981 | 26.826 | 31.287 | 31.383 |
| 60-data ahead forecasting | | | | | |
| SARIMA | 224.931 | 28.874 | 310.043 | 0.258 | 0.424 |
| TBATS | 183.780 | 21.558 | 235.665 | 0.211 | 0.250 |
| ETS | 146.437 | 16.449 | 212.028 | 0.168 | 0.223 |
| Decreased percentage (%) | | | | | |
| TBATS vs. SARIMA | 18.295 | 25.338 | 23.990 | 18.217 | 41.038 |
| TBATS vs. ETS | -20.319 | -23.699 | -10.030 | -20.379 | -10.800 |
| 84-data ahead forecasting | | | | | |
| SARIMA | 931.622 | 134.915 | 1016.813 | 1.040 | 1.679 |
| TBATS | 167.432 | 20.081 | 204.172 | 0.187 | 0.240 |
| ETS | 183.777 | 21.010 | 227.113 | 0.205 | 0.250 |
| Decreased percentage (%) | | | | | |
| TBATS vs. SARIMA | 82.028 | 85.116 | 79.920 | 82.019 | 85.706 |
| TBATS vs. ETS | 8.894 | 4.422 | 10.101 | 8.780 | 4.000 |
| 108-data ahead forecasting | | | | | |
| SARIMA | 1483.868 | 202.729 | 1588.876 | 1.560 | 2.500 |
| TBATS | 208.775 | 22.849 | 287.536 | 0.220 | 0.310 |
| ETS | 268.726 | 30.177 | 354.045 | 0.283 | 0.386 |
| Decreased percentage (%) | | | | | |
| TBATS vs. SARIMA | 85.930 | 88.729 | 81.903 | 85.897 | 87.600 |
| TBATS vs. ETS | 22.309 | 24.283 | 18.785 | 22.261 | 19.689 |

SARIMA seasonal autoregressive integrated moving average method, TBATS an advanced innovation state-space modeling framework by combining Box-Cox transformations, Fourier series with time-varying coefficients and autoregressive moving average error correction, ETS Error-Trend-Seasonal framework, MAD mean absolute deviation, MAPE mean absolute percentage error, RMSE root mean square error, MER mean error rate, RMSPE root mean square percentage error.

**Table S9** Comparisons of the forecasting results between SARIMA model and TBATS model on different datasets

| Sites | Models | Testing horizontal | | | |  |
| --- | --- | --- | --- | --- | --- | --- |
| MAD | MAPE | RMSE | MER | RMSPE |
| Liaoning province | The models developed using the HFRS incidence data from January 2004 to December 2016 (24-step-ahead forecast) | | | | | |
| SARIMA(2,1,1)(1,0,1)12 | 22.333 | 20.821 | 29.046 | 0.243 | 0.244 |
| TBATS(0.003, {0,0}, -, {<12,5>}) | 14.246 | 14.561 | 19.331 | 0.155 | 0.178 |
| Percentage reductions (%) | | | | |  |
| TBATS vs. SARIMA | 36.211 | 30.066 | 33.447 | 36.214 | 27.049 |
| The models developed using the HFRS incidence data from January 2004 to December 2015 (36-step-ahead forecast) | | | | | |
| SARIMA(3,0,2)(1,0,1)12 | 29.250 | 32.557 | 35.660 | 0.343 | 0.359 |
| TBATS(0.001, {0,0}, -, {<12,5>}) | 20.696 | 22.916 | 25.913 | 0.243 | 0.255 |
| Percentage reductions (%) | | | | |  |
| TBATS vs. SARIMA | 29.244 | 29.613 | 27.333 | 29.155 | 42.623 |
| The models developed using the HFRS incidence data from January 2004 to December 2014 (48-step-ahead forecast) | | | | | |
| SARIMA(3,0,2)(1,0,1)12 | 24.501 | 31.556 | 30.458 | 0.292 | 0.382 |
| TBATS(0.001, {0,0}, -, {<12,5>}) | 12.603 | 15.544 | 16.467 | 0.150 | 0.198 |
| Percentage reductions (%) | | | | |  |
| TBATS vs. SARIMA | 48.561 | 49.181 | 45.935 | 48.630 | 48.168 |
| Shanxi province | The models developed using the HFRS incidence data from January 2004 to December 2016 (24-step-ahead forecast) | | | | | |
| SARIMA(1,0,0)(0,1,1)12 | 55.042 | 31.864 | 123.787 | 0.347 | 0.410 |
| TBATS(0.001, {0,0}, 0.88, {<12,4>}) | 57.657 | 25.350 | 131.623 | 0.363 | 0.307 |
| Percentage reductions (%) | | | | |  |
| TBATS vs. SARIMA | -4.751 | 20.443 | -6.330 | -4.611 | 25.122 |
| The models developed using the HFRS incidence data from January 2004 to December 2015 (36-step-ahead forecast) | | | | |  |
| SARIMA(1,0,0)(0,1,1)12 | 57.083 | 53.074 | 104.220 | 0.434 | 0.729 |
| TBATS(0, {0,0}, 0.877, {<12,4>}) | 51.631 | 41.498 | 103.268 | 0.392 | 0.569 |
| Percentage reductions (%) |  |  |  |  |  |
| TBATS vs. SARIMA | 9.551 | 36.329 | 0.913 | 9.677 | 21.948 |
| The models developed using the HFRS incidence data from January 2004 to December 2014 (48-step-ahead forecast) | | | | |  |
| SARIMA(1,0,0)(0,1,0)12 | 54.583 | 78.019 | 93.730 | 0.427 | 1.174 |
| TBATS(0.001, {0,0}, 0.88, {<12,4>}) | 43.169 | 36.087 | 90.665 | 0.338 | 0.499 |
| Percentage reductions (%) |  |  |  |  |  |
| TBATS vs. SARIMA | 20.911 | 53.746 | 2.941 | 20.507 | 57.496 |

SARIMA seasonal autoregressive integrated moving average method, TBATS an advanced innovation state-space modeling framework by combining Box-Cox transformations, Fourier series with time-varying coefficients and autoregressive moving average error correction, MAD mean absolute deviation, MAPE mean absolute percentage error, RMSE root mean square error, MER mean error rate, RMSPE root mean square percentage error.

**Table S10** Time series of monthly HFRS notified cases in China from January 1995 to December 2020

| Time | January | February | March | April | May | June | July | August | September | October | November | December |
| --- | --- | --- | --- | --- | --- | --- | --- | --- | --- | --- | --- | --- |
| 1995 | 4734 | 5650 | 5492 | 5130 | 5153 | 5226 | 4320 | 2644 | 2039 | 3346 | 7510 | 8357 |
| 1996 | 4267 | 2617 | 3688 | 4246 | 3997 | 3749 | 2723 | 2025 | 1424 | 2324 | 5103 | 5531 |
| 1997 | 3381 | 2560 | 3495 | 3442 | 3691 | 3437 | 3218 | 2166 | 1726 | 2928 | 5804 | 5768 |
| 1998 | 3466 | 3961 | 4621 | 4343 | 4289 | 3765 | 2962 | 2398 | 1686 | 2590 | 5362 | 6070 |
| 1999 | 3111 | 2498 | 4069 | 4569 | 5153 | 4122 | 3310 | 2439 | 1752 | 2959 | 5824 | 6272 |
| 2000 | 3156 | 2402 | 2947 | 2969 | 3386 | 3400 | 2435 | 1765 | 1211 | 2107 | 5436 | 4684 |
| 2001 | 2219 | 2503 | 2676 | 2859 | 3467 | 3304 | 2702 | 1894 | 1456 | 2300 | 4206 | 4240 |
| 2002 | 2094 | 1536 | 2784 | 2723 | 3468 | 2867 | 2485 | 1761 | 1327 | 2087 | 3883 | 4041 |
| 2003 | 1925 | 1732 | 1057 | 2052 | 1367 | 2118 | 1673 | 1037 | 810 | 1280 | 2866 | 3579 |
| 2004 | 1225 | 1779 | 2535 | 2626 | 2678 | 2295 | 1667 | 981 | 997 | 1824 | 4189 | 3381 |
| 2005 | 1937 | 1378 | 1983 | 2168 | 2312 | 2158 | 1370 | 841 | 707 | 1429 | 3368 | 2635 |
| 2006 | 1583 | 1226 | 1456 | 1488 | 1536 | 1568 | 938 | 599 | 592 | 978 | 2112 | 2053 |
| 2007 | 991 | 1134 | 764 | 856 | 997 | 1204 | 839 | 560 | 460 | 879 | 1869 | 1721 |
| 2008 | 789 | 487 | 556 | 641 | 750 | 940 | 686 | 403 | 373 | 850 | 1543 | 1678 |
| 2009 | 749 | 619 | 547 | 608 | 749 | 1066 | 720 | 440 | 380 | 776 | 1516 | 1033 |
| 2010 | 533 | 361 | 452 | 497 | 628 | 788 | 626 | 338 | 316 | 952 | 2278 | 2013 |
| 2011 | 1082 | 551 | 609 | 625 | 885 | 923 | 670 | 424 | 376 | 959 | 2268 | 1951 |
| 2012 | 1115 | 765 | 793 | 773 | 947 | 1044 | 765 | 447 | 395 | 1296 | 3000 | 2578 |
| 2013 | 1437 | 848 | 998 | 1081 | 1318 | 1260 | 1023 | 592 | 517 | 1136 | 1811 | 1547 |
| 2014 | 1072 | 876 | 1008 | 1008 | 1106 | 1095 | 836 | 541 | 544 | 910 | 1744 | 1454 |
| 2015 | 1016 | 700 | 809 | 808 | 1011 | 1077 | 760 | 438 | 447 | 777 | 1614 | 1355 |
| 2016 | 949 | 644 | 745 | 699 | 828 | 857 | 617 | 420 | 394 | 631 | 1248 | 1250 |
| 2017 | 785 | 654 | 764 | 742 | 1094 | 1105 | 812 | 409 | 359 | 764 | 2021 | 2105 |
| 2018 | 1180 | 598 | 874 | 959 | 1253 | 1129 | 815 | 512 | 528 | 901 | 2213 | 1700 |
| 2019 | 1109 | 705 | 738 | 701 | 939 | 1007 | 703 | 411 | 346 | 649 | 1445 | 1364 |
| 2020 | 684 | 374 | 433 | 540 | 686 | 826 | 503 | 313 | 320 | 611 | 1796 | 1460 |
